# Supplementary material
Source: PubMed Central journal article supplement (PMC5216172)
Supplement: NIHMS839119-supplement-supplement_1.pdf [file NIHMS839119-supplement-supplement_1.pdf]

**Supplemental Table I.** Literature search scheme  
for OVID MEDLINE

---

1. explode DERMATITIS, ATOPIC/
  2. atopic dermatitis.mp.
  3. dermatitis atopic.mp.
  4. explode ECZEMA/ or eczema.mp
  5. childhood eczema.mp.
  6. infantile eczema.mp.
  7. neurodermatitis.mp. or exp Neurodermatitis/
  8. Besnier's prurigo.mp
  9. or/1-8
  10. smok\*
  11. cigarette
  12. nicotine
  13. tobacco
  14. 10-13
  15. 9 and 14
-
